# Supplementary material for: Dispersive liquid–liquid microextraction for the determination of urinary 8-hydroxy 2′-deoxyguanosine in COVID-19 patients by gas chromatography-mass spectrometry
Source: Royal Society of Chemistry journal article supplement (doi:10.1039/d4ay01937g), 2025-01-01
Supplement: d4ay01937g1.pdf [file d4ay01937g1.pdf]

## Supplementary Material

# Dispersive Liquid–Liquid Microextraction for the determination of urinary 8-hydroxy 2'-deoxyguanosine in COVID-19 patients by Gas chromatography-Mass spectrometry

Sanaz Zare <sup>a</sup>, Zohreh Zahraei <sup>a\*</sup>, Mohammad Khodadadi <sup>b\*</sup>, Maryam Zarean <sup>c</sup>, Azam Salehi <sup>d</sup>

<sup>a</sup> Department of Cell and Molecular Biology, Faculty of Chemistry, University of Kashan, Kashan, Iran

<sup>b</sup> Department of phytochemistry, Isfahan Pharmaceutical Sciences Research Center, Isfahan University of Medical Sciences, Isfahan, Iran

<sup>c</sup> Environment Research Center, Research Institute for Primordial Prevention of Non-Communicable Disease, Isfahan University of Medical Sciences, Isfahan, Iran

<sup>d</sup> School of Public Health, Isfahan University of Medical Sciences, Isfahan, Iran

Corresponding authors:

Zohreh Zahraei

Associate Professor of Biochemistry

Department of Cell and Molecular Biology, Faculty of Chemistry, University of Kashan, Kashan,  
8731751167, Islamic Republic of Iran

Fax: +98-03155912397, Tel: +98-03155912396

E-mail address: zahraei@kashanu.ac.ir

Mohammad Khodadadi

Department of phytochemistry, Isfahan Pharmaceutical Sciences Research Center, Isfahan University of Medical Sciences, Isfahan, Iran

Mohammad.kh.ph@gmail.com

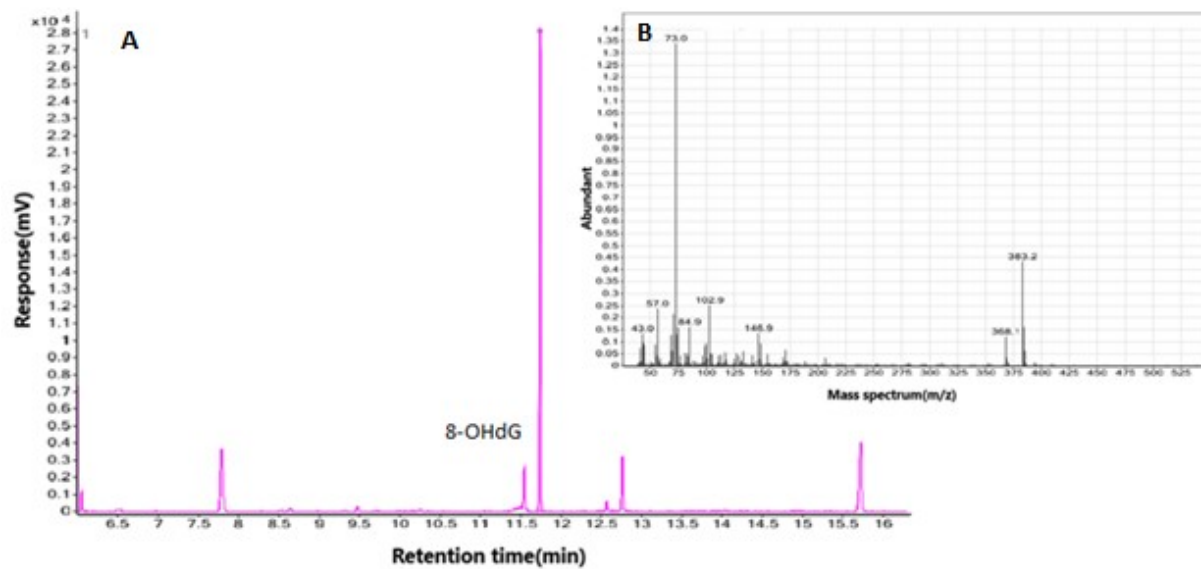

**Figure S1: A) Total ion chromatogram of trimethylsilylated extracted urine sample. B) The mass spectrum of 8-OHdG;  $m/z$  383 was selected as a quantitative ion in SIM analysis.**
